# Supplementary material for: Distinct dendritic Ca2+ spike forms produce opposing input-output transformations in rat CA3 pyramidal cells
Source: eLife. 2021 Nov 24;10:e74493. doi: 10.7554/eLife.74493 (PMC8612760; doi:10.7554/eLife.74493)
Supplement: Figure 1—figure supplement 1—source data 1. [file elife-74493-fig1-figsupp1-data1.xlsx]

## Sheet: Fig1-S1
Panel D					Panel F																			Panel G
									dual recording, Iinj at dendrite							dual recording, Iinj at soma
					single recording, Iinj at dendrite				somatic electrode			dendritic electrode				somatic electrode			dendritic electrode					bAP				DI Ca2+ spike
Cell	dV/dtratio	log			distance	Ampl	Width		distance	Ampl	Width	distance	Ampl	Width		distance	Ampl	Width	distance	Ampl	Width			distance	ampl	dV/dt		distance	ampl	dV/dt
1	0.00487	-2.31226			194.09	39.2293	1.60072		0	73.9005	0.92608	334.82	33.9504	1.13089		0	78.3183	0.90597	334.82	32.639	1.63045			194.09	39.2293	60.0637		182.3	10.9522	2.51561
	0.00735	-2.13382			160.92	57.5473	1.56599		0	81.856	0.87557	244.74	41.0551	1.27601		0	77.5853	0.96398	244.74	47.6276	1.07761			160.92	57.5473	96.3213		282.95	19.0129	2.93111
	0.00755	-2.12202			156.07	62.8436	1.37304		0	58.2963	1.04803	314.13	30.9954	1.63844		0	65.1821	1.03784	314.13	26.6125	1.7638			156.07	62.8436	175.858		223.12	34.4116	12.4415
	0.00828	-2.08195			195.11	33.2858	1.77233		0	80.0142	0.9351	185.74	48.7811	1.43764		0	75.6362	0.94604	185.74	51.7014	1.41887			195.11	33.2858	64.0875		296.53	35.6148	11.5945
	0.00959	-2.01811			202.9	29.7703	2.28535		0	73.9848	0.69633	259.76	43.0833	0.9288		0	67.1211	0.74576	259.76	54.6653	0.74763			202.9	29.7703	44.9043		182.1	26.48	14.0056
	0.00974	-2.01142			401.1	14.793	2.48522		0	55.5638	1.26142	175.72	64.4134	1.17025		0	60.1528	1.50388	175.72	77.3018	1.44247			401.1	14.793	21.7443		420	11.511	1.81344
	0.01066	-1.97226			365.86	14.8231	2.31962		0	80.2036	1.10417	254.93	32.55	1.73011		0	72.7713	1.19335	254.93	25.9604	2.25376			365.86	14.8231	19.0736		405	14.2809	1.63914
	0.01107	-1.95585			268.57	18.6216	1.74479		0	80.5908	1.11826	193.2	54.1932	1.85752		0	81.5077	1.20072	193.2	73.0592	1.76803			268.57	18.6216	31.6612		309	21.9426	4.75466
	0.01122	-1.9499			208.33	50.923	1.27435		0	47.56	1.3966	283.99	48.2924	1.86314		0	67.9344	1.18713	283.99	70.5986	1.97803			208.33	50.923	105.922		306	14.5736	2.00103
	0.01169	-1.93208			315.98	21.4772	2.43402		0	73.2775	1.03512	320.36	12.0633	1.79537		0	74.045	1.02052	320.36	27.4626	2.16321			315.98	21.4772	27.4665		349	42.7455	13.175
	0.01327	-1.87729			293.94	29.2443	2.13303		0	80.9219	0.91977	334.64	37.3982	2.26284		0	79.7593	0.9166	334.64	24.8829	1.65812			293.94	29.2443	51.625		264	25.3135	8.17772
	0.01342	-1.87231			391.905	21.2964	2.60958		0	91.1452	0.92906	213.78	46.5685	1.74381		0	90.7288	0.92785	213.78	55.348	1.36659			391.905	21.2964	26.4169		294	18.28	3.96251
	0.01354	-1.86847			366.72	23.6542	2.40688		0	84.4078	1.09512	245.47	49.2551	1.80368		0	73.7766	1.19254	245.47	54.2954	1.68802			366.72	23.6542	31.0518		276.15	30.643	7.32154
	0.01377	-1.86108			263.56	40.3781	2.10284		0	86.3278	0.85007	185.46	58.4411	1.16806		0	90.6028	0.82839	185.46	67.9707	1.15328			263.56	40.3781	94.9862		268.57	22.2821	5.54083
	0.01387	-1.8578			275.37	43.7036	1.21068		0	81.6849	0.79476	208.64	43.4972	1.12618		0	82.435	0.79864	208.64	33.6178	1.27201			275.37	43.7036	74.4411		193	44.1175	27.4766
	0.01482	-1.82902			330.5	42.2803	1.9042		0	80.9478	1.00607	165	49.8772	1.59684		0	89.4117	0.96754	165	54.4385	1.55934			330.5	42.2803	81.4825		214	22.9214	10.2331
	0.01615	-1.79195			325.07	39.3609	1.97061		0	83.9015	0.96037	276	31.6037	2.49089		0	87.6154	0.87926	276	40.4871	1.5023			325.07	39.3609	47.9125		172	24.6305	7.51534
	0.0163	-1.78779			295.99	43.747	1.82236		0	83.9015	0.96037	274	31.6037	2.49089		0	86.9125	1.01543	274	35.9946	1.84708			295.99	43.747	88.0445		248	36.7936	12.549
	0.01641	-1.78492			325.15	21.3235	2.49846		0	71.6563	1.07761	236	55.8044	1.57946		0	70.5421	0.99714	236	55.7279	1.37958			325.15	21.3235	38.2995		245	21.1148	3.42194
	0.01675	-1.77609			275.59	47.2432	1.03031																	275.59	47.2432	100.555
	0.01692	-1.77173			407.79	15.6749	2.22544																	407.79	15.6749	31.2812
	0.01803	-1.744			287.37	38.5877	1.72749																	287.37	38.5877	50.5075
	0.01884	-1.72492			433.02	28.8662	3.71828																	433.02	28.8662	47.76
	0.01924	-1.7158			236.45	42.3956	1.38312																	236.45	42.3956	103.76
	0.01925	-1.71558			236.04	45.1192	1.82298																	236.04	45.1192	63.7825
	0.01956	-1.70863			283.92	24.322	3.43669																	283.92	24.322	26.8931
	0.01961	-1.70749			220.27	38.8749	2.32509																	220.27	38.8749	47.913
	0.0205	-1.68824			183.88	42.8969	1.88693																	183.88	42.8969	71.2585
	0.02064	-1.68531			240.19	38.969	1.65724																	240.19	38.969	62.4085
	0.02166	-1.66434			149.06	43.241	1.97639																	149.06	43.241	56.763
	0.02208	-1.65598			225.26	31.491	1.15758																	225.26	31.491	94.9862
	0.02213	-1.65492			221.79	40.2874	1.71039																	221.79	40.2874	87.1663
	0.02455	-1.60989			150.73	55.3914	1.4025																	150.73	55.3914	141.144
	0.02528	-1.59725			129.48	57.5693	1.24193																	129.48	57.5693	102.615
	0.02783	-1.55542			100	67.0072	1.10012																	100	67.0072	235.901
	0.02831	-1.54803			370.42	16.3443	1.74727																	370.42	16.3443	38.2737
	0.03475	-1.4591			228.31	52.7723	1.10623																	228.31	52.7723	142.975
	0.03725	-1.42886			171.51	33.8886	1.79009																	171.51	33.8886	113.678
	0.04104	-1.38675			214.37	41.0322	1.80597																	214.37	41.0322	118.764
	0.04148	-1.38213			182.1	43.6543	1.21348																	182.1	43.6543	93.536
	0.05243	-1.28044			317.08	14.8097	2.06094																	317.08	14.8097	37.688
	0.0571	-1.24333			408	36.9424	1.7593																	408	36.9424	52.948
	0.07429	-1.12907			355.04	17.1007	3.03405																	355.04	17.1007	30.518
	0.08975	-1.04695			182.3	48.8882	1.43483																	182.3	48.8882	124.931
	0.09083	-1.04176			282.95	22.6966	1.89979																	282.95	22.6966	58.7463
	0.10015	-0.99935			223.12	40.493	2.0224																	223.12	40.493	84.2285
	0.20418	-0.68999			296.53	40.8394	2.46447																	296.53	40.8394	77.6675
	0.22175	-0.65414			109.7	61.8183	1.04181																	109.7	61.8183	215.608
	0.32293	-0.4909			230.78	46.2099	1.77665																	230.78	46.2099	123.29
	0.35873	-0.44523			280.22	42.7897	1.38701																	280.22	42.7897	81.33
	0.36018	-0.44348			277.27	47.8986	1.32498																	277.27	47.8986	76.142
	0.38046	-0.41969			306.49	25.656	1.93333																	306.49	25.656	57.5255
	0.45861	-0.33856			360.31	45.5897	2.24891																	360.31	45.5897	69.5805
	0.55536	-0.25543			308.81	17.0909	1.92423																	308.81	17.0909	36.4306
	0.59053	-0.22876			248.47	48.2381	1.72445																	248.47	48.2381	96.5119
	0.65838	-0.18152			262.52	40.87	1.27594																	262.52	40.87	76.446
	0.73055	-0.13635			231.48	51.3059	1.53482																	231.48	51.3059	95.5194
2	0.00204	-2.68967			175.181	59.9427	1.51873																	175.181	59.9427	163.88
	0.00348	-2.45817			235.59	55.4844	1.41095																	235.59	55.4844	99.4871
	0.00353	-2.45243			263.63	32.0286	1.42765																	263.63	32.0286	52.033
	0.00364	-2.43846			252.22	48.5431	1.42781																	252.22	48.5431	75.9885
	0.00436	-2.36061			225.37	58.1297	1.35671																	225.37	58.1297	106.811
	0.00475	-2.3237			233.78	34.9113	2.16589																	233.78	34.9113	71.869
	0.00558	-2.25373			213.16	60.1442	1.55142																	213.16	60.1442	98.6095
	0.00588	-2.23098			325.89	25.8762	2.77244																	325.89	25.8762	50.9263
	0.00692	-2.15976			301.81	15.1033	2.99601																	301.81	15.1033	25.635
	0.00701	-2.15426			159.03	51.3372	1.27586																	159.03	51.3372	165.051
	0.00716	-2.14512			209.28	44.2775	1.91147																	209.28	44.2775	98.2284
	0.00718	-2.14388			209.79	52.6401	1.84897																	209.79	52.6401	104.37
	0.00724	-2.14052			202.73	39.2584	1.89934																	202.73	39.2584	97.1986
	0.00727	-2.13856			235.19	28.7732	1.48594																	235.19	28.7732	73.548
	0.00748	-2.12635			234.42	58.4495	1.42567																	234.42	58.4495	146.332
	0.00748	-2.12618
	0.00755	-2.12186
	0.00806	-2.09354
	0.00812	-2.09048
	0.00816	-2.0885
	0.00834	-2.07909
	0.00873	-2.05891
	0.00886	-2.05252
	0.00893	-2.04894
	0.00901	-2.04517
	0.00909	-2.04135
	0.00918	-2.03713
	0.00919	-2.0365
	0.0092	-2.03612
	0.00921	-2.0357
	0.00929	-2.03214
	0.00938	-2.02783
	0.0094	-2.02689
	0.00977	-2.00993
	0.00983	-2.00738
	0.00991	-2.00396
	0.01018	-1.9922
	0.0103	-1.98724
	0.01044	-1.98128
	0.0105	-1.97863
	0.01055	-1.97666
	0.01061	-1.97448
	0.01071	-1.97011
	0.01073	-1.96933
	0.011	-1.95877
	0.0111	-1.95471
	0.01137	-1.94432
	0.01138	-1.94382
	0.0115	-1.93911
	0.01168	-1.93265
	0.0117	-1.93192
	0.01186	-1.92579
	0.01217	-1.91476
	0.01264	-1.89829
	0.01265	-1.89782
	0.01275	-1.89463
	0.01313	-1.88162
	0.01336	-1.87419
	0.0135	-1.86956
	0.01356	-1.86784
	0.01356	-1.86766
	0.01389	-1.85725
	0.01394	-1.85582
	0.01394	-1.85566
	0.0143	-1.84468
	0.01436	-1.84279
	0.01437	-1.84261
	0.01437	-1.84256
	0.01443	-1.84064
	0.01509	-1.82139
	0.01534	-1.81405
	0.01557	-1.80774
	0.01557	-1.80774
	0.01558	-1.80746
	0.01584	-1.80025
	0.01593	-1.79781
	0.01595	-1.79714
	0.01599	-1.79617
	0.01611	-1.79283
	0.01657	-1.7806
	0.01707	-1.76785
	0.01735	-1.7606
	0.01737	-1.76029
	0.01742	-1.75894
	0.01774	-1.75115
	0.01774	-1.75093
	0.01938	-1.71275
	0.02034	-1.69165
	0.0205	-1.68821
	0.02073	-1.68336
	0.02166	-1.66428
	0.02266	-1.6448
	0.02283	-1.64148
	0.02498	-1.60241
	0.02648	-1.5771
	0.03017	-1.52046
	0.0656	-1.18308
	0.08691	-1.06094
	0.08781	-1.05645
	0.12143	-0.91568
	0.1376	-0.86138
	0.13783	-0.86065
	0.14311	-0.84434
	0.15034	-0.82294
	0.15364	-0.81349
	0.16169	-0.79132
	0.17053	-0.7682
	0.17502	-0.75691
	0.1918	-0.71715
	0.68182	-0.16633
	0.71666	-0.14469
	0.77676	-0.10971
	0.80019	-0.09681
	0.8079	-0.09264
	0.83779	-0.07687
	0.98662	-0.00585
3	0.00178	-2.74966
	0.00215	-2.66848
	0.0027	-2.56908
	0.0039	-2.40922
	0.00477	-2.32186
	0.00528	-2.27764
	0.00549	-2.26017
	0.00565	-2.24772
	0.00601	-2.22091
	0.00622	-2.20646
	0.00672	-2.17288
	0.00679	-2.16786
	0.00681	-2.16691
	0.00688	-2.16217
	0.00693	-2.15933
	0.00694	-2.15852
	0.00714	-2.14611
	0.00719	-2.14312
	0.00722	-2.14136
	0.00727	-2.13871
	0.00736	-2.13339
	0.0074	-2.13095
	0.00773	-2.11198
	0.00774	-2.11147
	0.00781	-2.10757
	0.00781	-2.10746
	0.00806	-2.09374
	0.00807	-2.09287
	0.00846	-2.07258
	0.00849	-2.07097
	0.00874	-2.05833
	0.00886	-2.05278
	0.00896	-2.04777
	0.00912	-2.03996
	0.00921	-2.03557
	0.00947	-2.02375
	0.00967	-2.01461
	0.00967	-2.0145
	0.00969	-2.01375
	0.00971	-2.01289
	0.00981	-2.00831
	0.01002	-1.99903
	0.01022	-1.99063
	0.01034	-1.98543
	0.01039	-1.98347
	0.01042	-1.98198
	0.01055	-1.97663
	0.01057	-1.97594
	0.0107	-1.97054
	0.01076	-1.96827
	0.01108	-1.95557
	0.01117	-1.95211
	0.01133	-1.94564
	0.01137	-1.94439
	0.01147	-1.94038
	0.01162	-1.93495
	0.01164	-1.93421
	0.01186	-1.92588
	0.01193	-1.92327
	0.01194	-1.92313
	0.01196	-1.92222
	0.01198	-1.92145
	0.01199	-1.9211
	0.01206	-1.91869
	0.01207	-1.91837
	0.01208	-1.91805
	0.0125	-1.90324
	0.01259	-1.89983
	0.01266	-1.89741
	0.01272	-1.8956
	0.01274	-1.89492
	0.01309	-1.88315
	0.01325	-1.87764
	0.01331	-1.87587
	0.01332	-1.87556
	0.01365	-1.86496
	0.01375	-1.86178
	0.01379	-1.86031
	0.01392	-1.85624
	0.01403	-1.85291
	0.01444	-1.84056
	0.01448	-1.83934
	0.01454	-1.83753
	0.01478	-1.83038
	0.0149	-1.82668
	0.01496	-1.82519
	0.01507	-1.82179
	0.01577	-1.80216
	0.01596	-1.79708
	0.01659	-1.78025
	0.02045	-1.68932
	0.02056	-1.68701
	0.02243	-1.6491
	0.02265	-1.64497
	0.02319	-1.63466
	0.02392	-1.62117
	0.03741	-1.42704
	0.04085	-1.3888
	0.05893	-1.2297
	0.06066	-1.21713
	0.09652	-1.0154
	0.55492	-0.25577
4	0.00697	-2.1566
	0.00754	-2.12282
	0.00793	-2.10097
	0.00891	-2.04994
	0.00901	-2.0454
	0.01089	-1.96279
	0.01094	-1.96088
	0.01097	-1.95974
	0.01136	-1.94475
	0.01213	-1.91597
	0.01219	-1.91391
	0.01271	-1.89581
	0.01475	-1.83132
	0.01545	-1.81108
	0.01598	-1.79633
	0.01646	-1.78356
	0.01712	-1.7666
	0.01801	-1.74459
	0.01832	-1.73715
	0.01903	-1.72053
	0.01944	-1.71121
	0.02062	-1.68572
	0.02176	-1.66242
	0.02285	-1.64119
	0.02533	-1.59641
	0.02663	-1.57466
	0.02742	-1.56198
	0.02746	-1.56125
	0.02948	-1.5304
	0.02956	-1.52924
	0.0307	-1.5128
	0.03721	-1.4294
	0.03734	-1.42781
	0.03821	-1.41784
	0.04212	-1.37552
	0.04979	-1.3029
	0.06376	-1.19546
	0.07831	-1.10619
	0.1147	-0.94045
	0.13207	-0.87918
	0.13923	-0.85628
	0.1503	-0.82304
	0.15636	-0.80587
	0.15765	-0.80231
	0.17085	-0.76737
	0.17539	-0.756
	0.20628	-0.68555
	0.21876	-0.66003
	0.21924	-0.65909
	0.24718	-0.60698
	0.28507	-0.54505
	0.30069	-0.52188
	0.30839	-0.51089
	0.31377	-0.50339
	0.33929	-0.46943
	0.34172	-0.46633
	0.36926	-0.43267
	0.3765	-0.42423
	0.37886	-0.42152
	0.42001	-0.37674
	0.4693	-0.32855
	0.47111	-0.32688
	0.49249	-0.30761
	0.49589	-0.30461
	0.52048	-0.2836
	0.5453	-0.26337
	0.56547	-0.24759
	0.62063	-0.20717
5	0.00348	-2.45837
	0.00505	-2.29709
	0.00512	-2.29062
	0.00562	-2.25034
	0.00571	-2.24335
	0.00615	-2.21112
	0.00619	-2.20818
	0.0065	-2.18736
	0.00661	-2.17954
	0.00684	-2.16489
	0.00703	-2.15323
	0.00715	-2.14583
	0.00716	-2.14516
	0.00721	-2.14191
	0.00725	-2.13964
	0.00761	-2.11849
	0.00783	-2.10601
	0.00802	-2.09595
	0.00808	-2.09259
	0.00817	-2.08798
	0.0083	-2.08092
	0.00837	-2.0773
	0.00861	-2.06501
	0.00871	-2.05998
	0.00957	-2.01908
	0.00957	-2.01908
	0.00973	-2.01197
	0.01025	-1.98923
	0.01036	-1.98473
	0.01044	-1.98132
	0.01091	-1.96226
	0.01099	-1.95903
	0.01161	-1.93511
	0.01176	-1.92949
	0.01199	-1.92128
	0.01206	-1.91878
	0.01217	-1.91461
	0.01219	-1.91406
	0.0126	-1.89959
	0.01271	-1.896
	0.01353	-1.86881
	0.01443	-1.84081
	0.01443	-1.84072
	0.01454	-1.83751
	0.01484	-1.8286
	0.01495	-1.82537
	0.015	-1.82403
	0.01521	-1.81789
	0.01538	-1.81318
	0.01558	-1.80745
	0.01559	-1.80729
	0.01593	-1.79783
	0.01642	-1.78451
	0.01667	-1.77802
	0.01674	-1.77632
	0.0169	-1.77206
	0.01694	-1.771
	0.017	-1.76964
	0.01716	-1.76557
	0.01759	-1.75475
	0.01774	-1.75102
	0.01784	-1.74849
	0.0179	-1.74722
	0.01818	-1.74039
	0.01824	-1.73898
	0.01849	-1.73306
	0.02018	-1.69519
	0.02054	-1.68743
	0.02065	-1.68498
	0.02095	-1.6789
	0.02112	-1.67521
	0.02126	-1.67252
	0.02181	-1.66138
	0.02231	-1.65142
	0.02379	-1.62369
	0.0255	-1.59351
	0.02607	-1.58378
	0.02642	-1.578
	0.03426	-1.46516
	0.03752	-1.42574
6	0.00667	-2.1761
	0.00769	-2.11382
	0.00784	-2.10562
	0.00862	-2.06427
	0.00867	-2.06182
	0.00914	-2.03915
	0.00983	-2.00742
	0.00993	-2.00318
	0.00995	-2.00218
	0.01002	-1.9993
	0.01019	-1.99193
	0.01107	-1.95585
	0.01136	-1.94476
	0.01165	-1.93352
	0.01176	-1.92967
	0.01187	-1.92561
	0.01198	-1.92156
	0.0123	-1.91003
	0.01248	-1.90369
	0.01258	-1.90029
	0.01267	-1.89739
	0.01273	-1.89509
	0.01281	-1.8925
	0.01291	-1.8892
	0.01293	-1.88831
	0.01298	-1.88666
	0.01335	-1.87467
	0.01395	-1.85535
	0.01408	-1.85126
	0.01434	-1.84356
	0.01442	-1.84114
	0.01458	-1.83628
	0.01475	-1.83129
	0.01496	-1.82495
	0.01497	-1.82467
	0.0151	-1.82109
	0.01528	-1.81594
	0.01538	-1.8131
	0.01586	-1.79979
	0.01619	-1.79068
	0.01633	-1.78697
	0.01648	-1.78301
	0.01652	-1.78188
	0.01669	-1.77754
	0.01688	-1.77263
	0.0169	-1.77209
	0.01733	-1.7613
	0.01734	-1.76101
	0.01736	-1.76046
	0.01743	-1.7586
	0.01771	-1.75174
	0.01781	-1.74932
	0.01785	-1.74827
	0.01787	-1.74779
	0.01809	-1.74257
	0.01827	-1.73815
	0.01832	-1.73705
	0.01837	-1.73577
	0.0184	-1.73528
	0.01844	-1.7342
	0.01875	-1.72707
	0.01881	-1.7257
	0.01888	-1.72399
	0.01891	-1.72335
	0.01919	-1.71685
	0.02003	-1.69829
	0.02024	-1.69372
	0.02035	-1.69152
	0.02054	-1.68737
	0.0211	-1.67571
	0.0218	-1.66153
	0.02196	-1.65846
	0.022	-1.65763
	0.0229	-1.64011
	0.02384	-1.62278
	0.02705	-1.5678
	0.04503	-1.34651
	0.04841	-1.31511
	0.09554	-1.01984
	0.09959	-1.00178
	0.1662	-0.77936
	0.16976	-0.77017
	0.17983	-0.74514
	0.20731	-0.68339
	0.22939	-0.63942
	0.25458	-0.59417
	0.28391	-0.54683
	0.29739	-0.52667
	0.32554	-0.4874
	0.32715	-0.48525
	0.33301	-0.47754
	0.41873	-0.37807
	0.45394	-0.343
	0.45495	-0.34204
	0.49754	-0.30317
	0.53923	-0.26823
	0.57124	-0.24318
	0.63235	-0.19904
	0.65502	-0.18374
	0.72363	-0.14049
	0.73068	-0.13627
	0.80919	-0.09195
7	0.00606	-2.21768
	0.00646	-2.18981
	0.0065	-2.18725
	0.00678	-2.16904
	0.00678	-2.16846
	0.00776	-2.1103
	0.00788	-2.10337
	0.00793	-2.10048
	0.00804	-2.09465
	0.00846	-2.07238
	0.00847	-2.072
	0.0086	-2.06553
	0.00867	-2.0622
	0.0096	-2.01764
	0.0096	-2.01756
	0.00994	-2.00268
	0.01019	-1.99199
	0.01067	-1.97195
	0.01067	-1.97163
	0.01106	-1.9562
	0.01128	-1.94778
	0.01179	-1.92831
	0.01192	-1.92365
	0.01201	-1.92046
	0.01225	-1.91188
	0.01231	-1.90985
	0.01231	-1.90985
	0.01308	-1.88353
	0.01388	-1.85758
	0.01396	-1.85521
	0.0147	-1.83262
	0.01494	-1.82574
	0.01497	-1.8248
	0.01508	-1.8216
	0.01534	-1.81407
	0.01538	-1.81306
	0.01747	-1.75769
	0.01885	-1.72459
	0.01891	-1.72335
	0.02105	-1.67675
	0.02131	-1.67145
	0.02355	-1.62809
	0.02418	-1.61656
	0.02707	-1.56754
	0.02747	-1.56111
	0.03893	-1.40968
	0.04454	-1.35122
	0.09748	-1.01108
	0.10165	-0.99288
	0.10393	-0.98325
	0.10455	-0.98069
	0.11966	-0.92203
	0.13172	-0.88034
	0.14073	-0.8516
	0.16451	-0.78381
	0.20484	-0.68859
	0.2172	-0.66315
	0.23266	-0.63328
	0.27528	-0.56022
	0.2821	-0.5496
	0.29278	-0.53346
	0.29686	-0.52744
	0.31777	-0.49788
	0.35412	-0.45086
	0.37836	-0.4221
	0.44207	-0.35451
	0.48102	-0.31783
	0.50506	-0.29666
	0.66318	-0.17837
	0.71004	-0.14872
	0.72803	-0.13785
	0.74661	-0.12691
	0.83738	-0.07708
	0.87501	-0.05799
8	0.00536	-2.27106
	0.00586	-2.2324
	0.0064	-2.19367
	0.00664	-2.17768
	0.00688	-2.1627
	0.007	-2.15472
	0.00705	-2.15198
	0.0071	-2.14879
	0.00714	-2.14645
	0.00755	-2.1221
	0.00772	-2.11252
	0.00796	-2.09887
	0.00814	-2.08955
	0.00829	-2.08163
	0.00832	-2.08007
	0.0085	-2.07038
	0.00859	-2.06612
	0.00869	-2.06107
	0.0087	-2.0604
	0.0088	-2.05553
	0.00891	-2.05007
	0.00908	-2.04193
	0.00908	-2.04168
	0.00917	-2.0377
	0.00921	-2.03572
	0.00927	-2.0327
	0.00932	-2.03074
	0.00938	-2.02799
	0.00949	-2.02251
	0.00955	-2.01988
	0.00965	-2.01559
	0.01044	-1.98125
	0.01045	-1.98099
	0.01058	-1.97541
	0.01064	-1.97295
	0.01101	-1.95827
	0.01109	-1.95517
	0.01113	-1.95338
	0.01127	-1.94799
	0.01146	-1.94096
	0.0115	-1.93927
	0.01151	-1.93891
	0.01168	-1.93252
	0.01169	-1.93216
	0.01169	-1.93214
	0.01187	-1.9256
	0.0119	-1.92442
	0.01192	-1.92355
	0.01207	-1.91843
	0.01213	-1.91612
	0.0122	-1.91348
	0.01225	-1.9117
	0.01232	-1.90938
	0.01283	-1.89194
	0.0133	-1.87612
	0.01336	-1.87419
	0.0134	-1.87277
	0.01351	-1.86935
	0.01379	-1.86039
	0.01405	-1.85239
	0.01406	-1.85188
	0.01418	-1.84823
	0.01435	-1.84315
	0.01501	-1.82369
	0.0154	-1.81248
	0.01546	-1.81071
	0.01558	-1.80748
	0.01558	-1.80744
	0.01698	-1.76998
	0.01823	-1.73922
	0.01972	-1.70516
	0.02006	-1.69767
	0.14859	-0.828
	0.17046	-0.76838
	0.17075	-0.76765
	0.18085	-0.74268
	0.23261	-0.63337
	0.24004	-0.61971
	0.25917	-0.58642
	0.26585	-0.57537
	0.32419	-0.4892
	0.47088	-0.32709
9	0.00792	-2.10145
	0.0084	-2.0757
	0.0088	-2.05552
	0.00912	-2.03978
	0.00996	-2.00168
	0.00997	-2.0012
	0.01019	-1.99163
	0.01044	-1.98131
	0.01081	-1.9663
	0.01147	-1.94027
	0.01165	-1.93384
	0.01216	-1.91516
	0.01258	-1.90028
	0.01267	-1.89717
	0.0128	-1.89281
	0.01312	-1.88193
	0.01388	-1.85775
	0.01458	-1.83631
	0.01498	-1.82461
	0.01512	-1.82033
	0.01556	-1.80794
	0.01565	-1.80557
	0.01579	-1.8015
	0.01608	-1.7936
	0.01618	-1.79099
	0.01731	-1.76178
	0.02044	-1.68955
	0.02151	-1.66732
	0.02185	-1.66058
	0.02217	-1.65424
	0.02251	-1.64762
	0.02339	-1.63106
	0.02408	-1.61832
	0.02529	-1.597
	0.02818	-1.55006
	0.04128	-1.38426
	0.07351	-1.13365
	0.08725	-1.05924
	0.08877	-1.05175
	0.09108	-1.04057
	0.09264	-1.03319
	0.09726	-1.01205
	0.1054	-0.97714
	0.10616	-0.97405
	0.10762	-0.9681
	0.11065	-0.95606
	0.11492	-0.93959
	0.11888	-0.9249
	0.12588	-0.90004
	0.12765	-0.89398
	0.18031	-0.74397
	0.1815	-0.74113
	0.19235	-0.71591
	0.22108	-0.65544
	0.23373	-0.63129
	0.51729	-0.28627
	0.88469	-0.05321
10	0.00708	-2.14993
	0.01022	-1.99071
	0.01115	-1.95272
	0.01152	-1.93838
	0.01189	-1.92469
	0.01206	-1.91872
	0.01237	-1.9075
	0.01241	-1.90616
	0.01267	-1.89712
	0.01311	-1.88241
	0.01329	-1.87635
	0.01391	-1.85666
	0.01399	-1.85406
	0.0141	-1.85071
	0.01426	-1.84585
	0.0153	-1.81543
	0.01557	-1.80766
	0.01558	-1.80732
	0.0156	-1.80694
	0.01565	-1.80555
	0.01596	-1.79696
	0.01613	-1.79246
	0.01631	-1.78766
	0.01641	-1.78484
	0.01644	-1.78409
	0.01666	-1.77822
	0.01679	-1.77494
	0.01682	-1.77408
	0.01689	-1.77242
	0.01724	-1.76342
	0.01729	-1.76228
	0.0173	-1.76194
	0.01738	-1.76
	0.01761	-1.75433
	0.01766	-1.75307
	0.01802	-1.74434
	0.01803	-1.744
	0.01813	-1.74156
	0.01838	-1.73568
	0.0186	-1.7305
	0.01865	-1.72925
	0.01889	-1.72369
	0.0189	-1.72363
	0.01917	-1.71729
	0.01933	-1.71381
	0.01975	-1.70454
	0.0198	-1.70337
	0.0199	-1.70106
	0.02003	-1.69828
	0.02027	-1.69322
	0.02052	-1.68788
	0.0206	-1.68609
	0.02073	-1.6835
	0.02094	-1.67898
	0.02095	-1.67889
	0.02096	-1.67859
	0.02115	-1.6746
	0.02121	-1.67343
	0.02138	-1.66999
	0.02168	-1.66395
	0.02232	-1.65128
	0.02251	-1.64755
	0.02265	-1.64496
	0.02291	-1.63997
	0.02316	-1.63528
	0.02343	-1.63031
	0.02372	-1.62487
	0.024	-1.61979
	0.02422	-1.6159
	0.02524	-1.5979
	0.02542	-1.59477
	0.0266	-1.57506
	0.02677	-1.57231
	0.02703	-1.56817
	0.02721	-1.56535
	0.02725	-1.56459
	0.02883	-1.54022
	0.02915	-1.53534
	0.03043	-1.51676
	0.03082	-1.51121
	0.03133	-1.50399
	0.03145	-1.50238
	0.03149	-1.50188
	0.03162	-1.50003
	0.03796	-1.42072
	0.03976	-1.40053
	0.04695	-1.32838
11	0.00879	-2.05587
	0.00979	-2.00934
	0.01	-2.00005
	0.01037	-1.98427
	0.01053	-1.9775
	0.01058	-1.9754
	0.0106	-1.97469
	0.01125	-1.94891
	0.01155	-1.93745
	0.01158	-1.93645
	0.01187	-1.9254
	0.01215	-1.91555
	0.01229	-1.91059
	0.01238	-1.90741
	0.01238	-1.90711
	0.0124	-1.90654
	0.01251	-1.90259
	0.01277	-1.89378
	0.01277	-1.89364
	0.01303	-1.88511
	0.01304	-1.88475
	0.01341	-1.87243
	0.01351	-1.86942
	0.01354	-1.86848
	0.01363	-1.86563
	0.01385	-1.85859
	0.01412	-1.85015
	0.01413	-1.84999
	0.01418	-1.84838
	0.01471	-1.83246
	0.01477	-1.83067
	0.01516	-1.81932
	0.01516	-1.81921
	0.01542	-1.81189
	0.01545	-1.81095
	0.01648	-1.78301
	0.01719	-1.76485
	0.0178	-1.74961
	0.01801	-1.74458
	0.01821	-1.73965
	0.01829	-1.73768
	0.01904	-1.72038
	0.01926	-1.71545
	0.01927	-1.71504
	0.0206	-1.68621
	0.02075	-1.68293
	0.0221	-1.65569
	0.02229	-1.65195
	0.02269	-1.64411
	0.02351	-1.62883
	0.02439	-1.61282
	0.02538	-1.59547
	0.03173	-1.49854
	0.03531	-1.45215
	0.03575	-1.44678
	0.04498	-1.34699
	0.07647	-1.11652
	0.09532	-1.02081
	0.11775	-0.92904
	0.14236	-0.84663
	0.85884	-0.06609
	0.91419	-0.03896
	0.92591	-0.03343
12	0.00374	-2.42719
	0.00473	-2.32517
	0.00511	-2.29199
	0.00556	-2.25454
	0.00558	-2.25371
	0.00578	-2.23811
	0.00594	-2.22653
	0.00624	-2.20485
	0.00626	-2.20354
	0.00647	-2.18908
	0.00687	-2.16287
	0.00713	-2.14665
	0.00792	-2.10122
	0.00795	-2.0999
	0.00816	-2.08836
	0.00841	-2.07512
	0.00863	-2.06395
	0.0087	-2.06043
	0.00874	-2.05842
	0.00876	-2.05738
	0.00903	-2.04407
	0.00912	-2.03987
	0.00943	-2.02533
	0.00965	-2.01567
	0.00985	-2.00645
	0.00993	-2.00322
	0.00995	-2.0021
	0.00998	-2.00091
	0.01009	-1.99618
	0.01031	-1.98688
	0.01042	-1.98223
	0.01042	-1.98198
	0.01072	-1.96967
	0.01089	-1.96304
	0.0111	-1.95457
	0.01116	-1.95222
	0.01143	-1.94198
	0.01192	-1.9239
	0.01202	-1.92015
	0.01216	-1.91515
	0.01534	-1.81422
	0.0157	-1.80401
	0.02827	-1.54861
	0.08412	-1.07513
	0.2915	-0.53537
	0.31126	-0.50688
	0.31572	-0.50069
	0.32711	-0.48531
13	0.0075	-2.12513
	0.00937	-2.02821
	0.0094	-2.02668
	0.00964	-2.01611
	0.01058	-1.97559
	0.01073	-1.96945
	0.01092	-1.96191
	0.01101	-1.95818
	0.01123	-1.94965
	0.01145	-1.94126
	0.01165	-1.9336
	0.01177	-1.92908
	0.01184	-1.9266
	0.01235	-1.90827
	0.01254	-1.90183
	0.01318	-1.88021
	0.01324	-1.87811
	0.01334	-1.87472
	0.0135	-1.86962
	0.01366	-1.86468
	0.01418	-1.84827
	0.01457	-1.8366
	0.01483	-1.82898
	0.01486	-1.82785
	0.01509	-1.8214
	0.01614	-1.79213
	0.01626	-1.78896
	0.01638	-1.78562
	0.01682	-1.77426
	0.01731	-1.76167
	0.01759	-1.75482
	0.01765	-1.75327
	0.01843	-1.73448
	0.0195	-1.70999
	0.0206	-1.68622
	0.02318	-1.63494
	0.02428	-1.61474
	0.02435	-1.61349
	0.02458	-1.60949
	0.03218	-1.4924
	0.05344	-1.2721
	0.07959	-1.09916
	0.08614	-1.06482
	0.1075	-0.96859
	0.19471	-0.71062
	0.23495	-0.62903
	0.26336	-0.57945
	0.26379	-0.57875
	0.27982	-0.55311
	0.31132	-0.50679
	0.32013	-0.49468
	0.34373	-0.46378
	0.346	-0.46092
	0.34869	-0.45756
	0.35441	-0.45049
	0.35649	-0.44796
	0.37565	-0.42522
	0.38154	-0.41846
	0.41709	-0.37977
	0.46374	-0.33372
	0.46388	-0.3336
	0.48869	-0.31097
	0.51661	-0.28684
	0.55005	-0.25959
	0.55176	-0.25825
	0.58908	-0.22983
	0.67936	-0.1679
	0.70906	-0.14932
	0.82127	-0.08552
14	0.00487	-2.31211
	0.00626	-2.20338
	0.00642	-2.1924
	0.00655	-2.18347
	0.00696	-2.15761
	0.00832	-2.07994
	0.00837	-2.07735
	0.00863	-2.06378
	0.01006	-1.99735
	0.01054	-1.97697
	0.0106	-1.97487
	0.01061	-1.97422
	0.01074	-1.96887
	0.01184	-1.92679
	0.01185	-1.92628
	0.01256	-1.901
	0.01282	-1.89205
	0.01335	-1.87468
	0.01401	-1.85364
	0.0142	-1.84784
	0.01445	-1.84015
	0.01536	-1.81374
	0.01545	-1.81097
	0.01558	-1.80729
	0.0158	-1.8013
	0.01611	-1.79292
	0.01629	-1.78809
	0.01647	-1.78331
	0.01667	-1.7781
	0.01696	-1.77061
	0.01766	-1.75303
	0.02024	-1.69381
	0.02178	-1.66193
	0.02206	-1.65633
	0.02223	-1.65301
	0.02235	-1.65063
	0.02323	-1.63391
	0.02342	-1.6304
	0.02365	-1.62614
	0.02386	-1.62241
	0.02399	-1.61988
	0.02408	-1.61835
	0.02442	-1.61234
	0.02627	-1.58054
	0.02709	-1.5672
	0.0318	-1.49751
	0.03574	-1.44681
	0.05495	-1.26004
	0.0927	-1.03293
	0.09803	-1.00864
	0.13104	-0.8826
	0.14252	-0.84612
	0.14686	-0.83308
	0.15254	-0.81662
	0.15656	-0.80531
	0.1725	-0.7632
	0.18101	-0.74231
	0.19663	-0.70635
	0.19715	-0.7052
	0.21414	-0.6693
	0.22304	-0.65162
	0.25525	-0.59304
	0.2729	-0.564
	0.27926	-0.554
	0.30723	-0.51253
	0.34086	-0.46742
	0.34126	-0.46692
	0.7196	-0.14291
	0.73103	-0.13606
	0.86976	-0.0606
15	0.00609	-2.21565
	0.00676	-2.16978
	0.0077	-2.11353
	0.00798	-2.09805
	0.0089	-2.05037
	0.00933	-2.03002
	0.00952	-2.02134
	0.01111	-1.95419
	0.01113	-1.95343
	0.01116	-1.95225
	0.01155	-1.93751
	0.01189	-1.92497
	0.01195	-1.92256
	0.01232	-1.9093
	0.01246	-1.90443
	0.01261	-1.89926
	0.01272	-1.89564
	0.01278	-1.89351
	0.01301	-1.88556
	0.01302	-1.88537
	0.01358	-1.86709
	0.01374	-1.86216
	0.01404	-1.85264
	0.01406	-1.85191
	0.01408	-1.85151
	0.0141	-1.85063
	0.01449	-1.83891
	0.0145	-1.83857
	0.01452	-1.83793
	0.01467	-1.8335
	0.0147	-1.83258
	0.01504	-1.82262
	0.01519	-1.81843
	0.0153	-1.81533
	0.01546	-1.81076
	0.01581	-1.80105
	0.01641	-1.78498
	0.01646	-1.7837
	0.01655	-1.78115
	0.01706	-1.76793
	0.01713	-1.76613
	0.01732	-1.76138
	0.01736	-1.76038
	0.01772	-1.75157
	0.01783	-1.74897
	0.01807	-1.74304
	0.01864	-1.72962
	0.01914	-1.71799
	0.01923	-1.71613
	0.01923	-1.71608
	0.02003	-1.69831
	0.02036	-1.69131
	0.02057	-1.68684
	0.02097	-1.67832
	0.02146	-1.66841
	0.02162	-1.66518
	0.02164	-1.66467
	0.02165	-1.66461
	0.02219	-1.65377
	0.0232	-1.63449
	0.04976	-1.30313
	0.20858	-0.68073
	0.21643	-0.66468
	0.25083	-0.60061
	0.25735	-0.58947
	0.27513	-0.56046
	0.28053	-0.55202
	0.30463	-0.51623
	0.3157	-0.50072
16	0.00649	-2.18758
	0.00705	-2.15197
	0.00757	-2.12093
	0.0082	-2.08613
	0.00828	-2.08219
	0.00839	-2.07607
	0.00942	-2.02606
	0.00978	-2.0098
	0.01027	-1.98851
	0.01095	-1.96058
	0.01122	-1.9501
	0.01131	-1.94644
	0.01133	-1.94582
	0.01148	-1.93997
	0.0118	-1.92821
	0.01182	-1.92724
	0.01213	-1.91611
	0.01219	-1.91391
	0.01224	-1.91239
	0.01264	-1.89809
	0.0127	-1.8962
	0.01284	-1.89147
	0.01342	-1.87219
	0.01349	-1.86985
	0.01357	-1.8674
	0.01358	-1.86709
	0.0137	-1.86327
	0.01374	-1.86216
	0.01386	-1.85827
	0.01387	-1.8579
	0.01394	-1.8558
	0.0142	-1.84779
	0.0144	-1.8416
	0.01441	-1.84128
	0.01442	-1.84106
	0.01481	-1.82934
	0.01519	-1.8184
	0.01579	-1.80175
	0.01595	-1.79728
	0.01614	-1.79213
	0.01655	-1.78123
	0.017	-1.76962
	0.01707	-1.76786
	0.01747	-1.7578
	0.01871	-1.72784
	0.01921	-1.71641
	0.01923	-1.71602
	0.01986	-1.70196
	0.01996	-1.69984
	0.02029	-1.69279
	0.02029	-1.69273
	0.02249	-1.64809
	0.02356	-1.6278
	0.32935	-0.48234
	0.34658	-0.4602
	0.4191	-0.37768
	0.55546	-0.25535
	0.60852	-0.21572
	0.63113	-0.19988
	0.6836	-0.1652
	0.80786	-0.09266
	0.81559	-0.08853
