# Supplementary material for: Distinct dendritic Ca2+ spike forms produce opposing input-output transformations in rat CA3 pyramidal cells
Source: eLife. 2021 Nov 24;10:e74493. doi: 10.7554/eLife.74493 (PMC8612760; doi:10.7554/eLife.74493)
Supplement: Figure 1—source data 1. [file elife-74493-fig1-data1.xlsx]

## Sheet: Fig1
Panel D					Panel E
							top panel	bottom panel
distance	soma-ddr	ddr-soma			electrode	distance	Amplitude	Width
185.74	0.75287	0.52076			somatic	0	78.3183	0.90597
259.76	0.74184	0.70555				0	77.5853	0.96398
175.72	0.68968	0.88551				0	65.1821	1.03784
254.93	0.51061	0.45361				0	75.6362	0.94604
193.2	0.74022	0.50763				0	67.1211	0.74576
320.36	0.59674	0.31404				0	60.1528	1.50388
334.64	0.68044	0.5556				0	72.7713	1.19335
213.78	0.70449	0.50262				0	81.5077	1.20072
245.47	0.82687	0.62467				0	67.9344	1.18713
185.46	0.81128	0.81793				0	74.045	1.02052
208.64	0.7857	0.7755				0	79.7593	0.9166
164.55	0.95841	0.61848				0	90.7288	0.92785
280	0.52469	0.39545				0	73.7766	1.19254
236	0.74946	0.62213				0	90.6028	0.82839
265.23	0.56566	0.5089				0	82.435	0.79864
						0	89.4117	0.96754
						0	87.6154	0.87926
						0	86.9125	1.01543
						0	70.5421	0.99714
					dendritic	334.82	32.639	1.63045
						244.74	47.6276	1.07761
						314.13	26.6125	1.7638
						185.74	51.7014	1.41887
						259.76	54.6653	0.74763
						175.72	77.3018	1.44247
						254.93	25.9604	2.25376
						193.2	73.0592	1.76803
						283.99	70.5986	1.97803
						320.36	27.4626	2.16321
						334.64	24.8829	1.65812
						213.78	55.348	1.36659
						245.47	54.2954	1.68802
						185.46	67.9707	1.15328
						208.64	33.6178	1.27201
						165	54.4385	1.55934
						276	40.4871	1.5023
						274	35.9946	1.84708
						236	55.7279	1.37958
