# Supplementary material for: Distinct dendritic Ca2+ spike forms produce opposing input-output transformations in rat CA3 pyramidal cells
Source: eLife. 2021 Nov 24;10:e74493. doi: 10.7554/eLife.74493 (PMC8612760; doi:10.7554/eLife.74493)
Supplement: Figure 2—source data 1. [file elife-74493-fig2-data1.xlsx]

## Sheet: Fig2
Panel I					Panel J				Panel K
	Amplitude	Amplitude
Spike type	Dendrite	Soma			Spike type	AR			Spike type	N	ratio
slow ADP	31.07	14.05			slow ADP	2.21062			slow ADP	6	0.38095
slow ADP	20.3755	9.57417			slow ADP	2.12817			fast ADP	9	0.42857
slow ADP	24.5728	14.1726			slow ADP	1.73383			DI	7	0.33333
slow ADP	12.34	2.31			slow ADP	5.33389			no spike	4	0.19048
fast ADP	17.07	1.78			fast ADP	8.92153
fast ADP	24.65	5.00987			fast ADP	4.92023
fast ADP	11.5449	1.1367			fast ADP	10.1565
DI	44.12	3.94413			DI	11.1856
DI	22.9214	3.40027			DI	6.74105
DI	21.1148	3.7534			DI	5.62552
DI	22.3248	4.33356			DI	5.1516
DI	20.0832	3.27704			DI	6.12845
