# Supplementary material for: Distinct dendritic Ca2+ spike forms produce opposing input-output transformations in rat CA3 pyramidal cells
Source: eLife. 2021 Nov 24;10:e74493. doi: 10.7554/eLife.74493 (PMC8612760; doi:10.7554/eLife.74493)
Supplement: Figure 3—figure supplement 2—source data 1. [file elife-74493-fig3-figsupp2-data1.xlsx]

## Sheet: Fig3-S2
Panel C
i	threshold Iinj		ii	frequency		iii	amplitude
control	NBQX+AP5		control	NBQX+AP5		control	NBQX+AP5
500	500		5.44444	6.88889		19.232	21.7218
300	300		2	2.22222		15.1698	17.1176
300	300		0.83333	0.5		20.2704	20.7474
400	400		0.75	1		15.6556	13.9404
