# Supplementary material for: Distinct dendritic Ca2+ spike forms produce opposing input-output transformations in rat CA3 pyramidal cells
Source: eLife. 2021 Nov 24;10:e74493. doi: 10.7554/eLife.74493 (PMC8612760; doi:10.7554/eLife.74493)
Supplement: Figure 3—figure supplement 3—source data 1. [file elife-74493-fig3-figsupp3-data1.xlsx]

## Sheet: Fig3-S3
Panel D							Panel E							Panel F				Panel I	CA1 data
																		top	bottom
	300 pA	400 pA	500 pA	600 pA				300 pA	400 pA	500 pA	600 pA			distance	probability			amplitude	width
bAP	0.75	0.91667	1	1			ADP	0	0.25	0.66667	0.66667			230.2	0			22.9099	52.2571
Ca2+ spike	0	0.25	0.66667	0.66667			DI	0	0	0	0			386.05	0			25.3072	37.03
Na+ spike	0	0.08333	0.08333	0.08333										349.2	0			24.9604	42.3582
														390	0			25.6249	25.0975
														351.48	0			23.6066	25.64
														299.1	0			3.08981	53.88
														366	0			27.0459
														457.48	0
														418.71	0
														227	0
														411	0
														279	0
