# Supplementary material for: Distinct dendritic Ca2+ spike forms produce opposing input-output transformations in rat CA3 pyramidal cells
Source: eLife. 2021 Nov 24;10:e74493. doi: 10.7554/eLife.74493 (PMC8612760; doi:10.7554/eLife.74493)
Supplement: Figure 3—source data 1. [file elife-74493-fig3-data1.xlsx]

## Sheet: Fig3
Panel F								Panel G	Panel H			Panel I					Panel J				Panel N				Panel O
left
	300 pA	400 pA	500 pA	600 pA			group	Ampl	Distance			300 pA	400 pA	500 pA			distance	probability
bAP	0.8	0.92857	0.97143	0.97143			ADP	6.21	236			0	1	0			100	0	100-151 micron		ADP	DI			Ampl
Ca2+ spike	0.45714	0.62857	0.75714	0.8			ADP	4.58	283.92			0	0	1			110	0			0	1			22.8511
Na+ spike	0	0	0.02857	0.12857			ADP	18.01	230.78			1	0	0			129	0			0	0.8			29.7153
							ADP	10.61	214			0	1	1			149.06	0			0.33333	0.66667			9.01193
right							ADP	17.14	335			0	0.538	0.538			150.73	0			0.90909	0			35.7357
	300 pA	400 pA	500 pA	600 pA			ADP	10.2624	314			0	0	0			159	0	151-299 micron		0	0			7.75932
ADP	0.37143	0.37143	0.35714	0.32857			ADP	24.65	186			0	0	1			165	1			0	1
DI	0.17143	0.31429	0.44286	0.51429			ADP	11.5449	255			0	0	0.857			172	1			0.94118	0
							ADP	12.8747	182.3			0	0	0			175	0			0.29412	0
							ADP	16.89	182.1			0	0	0			176	0			0	0
							ADP	27.01	248			0	0	0			182.1	1			0	0.33333
							ADP	26.6	231			0.3	0.6	0			182.3	0
							ADP	26.77	236			0	0	0			185	0
							ADP	6.2	234			0	0	0			186	0
							ADP	18.44	227			0	1	0			193	1
							ADP	11.7427	279			0	1	1			202.9	0.538
							ADP	25.6877	234			1	1	0			203	1
							ADP	16	274			1	1	0			208	0
												1	1	1			209	0
							DI	10.95	182.3			0	1	1			209	1
							DI	19.01	282.95			0	0	1			210	1
							DI	34.4116	223.12			0.1	0	1			213	0
							DI	35.61	296.53			0	1	1			214	0
							DI	26.48	182.1			0	0	1			214	0
							DI	11.511	420			0	0	1			214	1
							DI	14.2809	405			0.9	0	0			220.27	0
							DI	21.9426	309			0	1	0			223.12	1
							DI	14.5736	306			1	1	1			225	0.75
							DI	42.75	349			0	0	0			225.26	0
							DI	25.31	264			0	0	0			227	1
							DI	18.28	294			0	1	0			228.31	0
							DI	30.64	276.15			0	0	1			230.78	0
							DI	22.28	268.57			0	0	1			231	0.2
							DI	44.12	193			0	0	0			234	0.7
							DI	24.04	265			0	0	0			234	0
							DI	22.9214	214			0	0	1			235	0.9
							DI	24.6305	172			0	0	0			236	0
							DI	36.7936	248			0	0	0			236	0
							DI	22.05	231			0	0	1			240.19	0
							DI	27.2216	315			0	0	0			245	0
							DI	17.242	326			0	0	0.14			245	0.3
							DI	41.4246	227			0	0	0			248	1
							DI	44.7497	209			0	0	0			252	0
							DI	19.4313	210			0	0	0			255	0
							DI	25.7852	203			0	0	0			260	0
							DI	21.9175	235			0	0	0			263	0
							DI	24.6821	234			0	0	0			263	0
							DI	15.67	276			0	1	0			264	1
							DI	22.32	165			0	0	0			264	0
												0	0	1			265	1
												0	0	0			268.57	1
												0	0	0			270	0
												0	0	1			274	0
												0.3	0	1			276	0
												0	0	0.3			276.15	1
												0	0	0			277	1
												0	0	0			279	1
												0	0	0			280	0
												0	0.4	0.2			282.95	1
												0	0	0			283.92	0.857
												0.7	0	0			296.53	0
												0	0	0			302	0	301-450 micron
												0	1	0			306	1
												0	0	0.75			309	1
												0.5	0	0.7			314	0
												0	1	0			315	1
												0	1	1			316	0
												1	0	0			317	0.14
												0	0	1			320	0
												0	0.899	0			326	1
													0.09	0			331	0
													0	1			335	0
													0.9	1			335	0
													0	0			349	1
													0	1			349	0
														1			355.04	0
														1			360	1
														0.9			365.86	0
														0			367	0
														1			370.42	0
														0			392	0
														0			393	0
																	401.1	1
																	405	1
																	408	0
																	420	1
																	450	0
