# Supplementary material for: Distinct dendritic Ca2+ spike forms produce opposing input-output transformations in rat CA3 pyramidal cells
Source: eLife. 2021 Nov 24;10:e74493. doi: 10.7554/eLife.74493 (PMC8612760; doi:10.7554/eLife.74493)
Supplement: Figure 4—source data 1. [file elife-74493-fig4-data1.xlsx]

## Sheet: Fig4
Panel A				Panel B			Panel D					Panel E					Panel F
Distance	Ampl			Width			Experiment	Iinj	Ampl			Experiment	Norm. Iinj	Norm. ampl			Experiment	Norm. Iinj	AP probability
182.3	10.95			8.57			1	400	19.01			1	1	1			1	1	0
282.95	19.01			3.08				500	12.77				1.25	0.67175				1.25	0
223.12	34.4116			2.93				600	11.45				1.5	0.60231				1.5	0
296.53	35.61			13.28				700	7.62				1.75	0.40084				1.75	0
182.1	26.48			12.17			2	200	34.4116			2	1	1			2	1	1
420	11.511			10.89				300	23.9624				1.5	0.69635				1.5	1
405	14.2809			4.48				400	20.77				2	0.60358				2	1
309	21.9426			4.43				500	12.6946				2.5	0.3689				2.5	1
306	14.5736			6.74				600	8.06403				3	0.23434				3	1
349	42.75			3.9			3	600	35.61			3	1	1			3	1	1
264	25.31			5.98				700	32.95				1.16667	0.9253				1.16667	1
294	18.28			7.312				800	25.15				1.33333	0.70626				1.33333	0.4
276.15	30.64			3.32				900	22.07				1.5	0.61977				1.5	0.1
268.57	22.28			6.143			4	300	21.9426			4	1	1			4	1	1
193	44.12			8.98				400	17.9291				1.33333	0.81709				1.33333	1
265	24.04			5.9				500	12.2742				1.66667	0.55938				1.66667	1
214	22.9214			3.06			5	500	14.5736			5	1	1			5	1	0.4
172	24.6305			4.656				600	13.198				1.2	0.90561				1.2	0
248	36.7936							900	8.43829				1.8	0.57901				1.8	0
231	22.05						6	400	25.31			6	1	1			6	1	0.625
315	27.2216							500	18.66				1.25	0.73726				1.25	0
326	17.242							600	10.4				1.5	0.4109				1.5	0
227	41.4246							700	8.42				1.75	0.33267				1.75	0
209	44.7497						7	600	18.28			7	1	1			7	1	0
210	19.4313							700	12.56				1.16667	0.68709				1.16667	0
203	25.7852							800	5.73				1.33333	0.31346				1.33333	0
235	21.9175						8	600	44.12			8	1	1			8	1	1
234	24.6821							700	31.43				1.16667	0.71238				1.16667	1
276	15.67							800	20.23				1.33333	0.45852				1.33333	1
165	22.32						9	240	19.73			9	1	0.82072			9	1	0
								300	24.04				1.25	1				1.25	0
								400	14.86				1.66667	0.61814				1.66667	0
								500	6.82				2.08333	0.28369				2.08333	0
								600	3.63				2.5	0.151				2.5	0
							10	500	22.9214			10	1	1			10	1	0.4
								600	14.441				1.2	0.63002				1.2	0.1
								700	9.24682				1.4	0.40341				1.4	0
								800	6.33047				1.6	0.27618				1.6	0
							11	500	24.6305			11	1	1			11	1	1
								600	17.2586				1.2	0.7007				1.2	0.3
								700	10.3477				1.4	0.42012				1.4	0
								800	7.08915				1.6	0.28782				1.6	0.1
							12	350	36.7936			12	1	1			12	1	1
								400	30.6362				1.14286	0.83265				1.14286	1
								500	17.9153				1.42857	0.48692				1.42857	0.2
								600	12.0211				1.71429	0.32672				1.71429	0.2
