# Supplementary material for: Distinct dendritic Ca2+ spike forms produce opposing input-output transformations in rat CA3 pyramidal cells
Source: eLife. 2021 Nov 24;10:e74493. doi: 10.7554/eLife.74493 (PMC8612760; doi:10.7554/eLife.74493)
Supplement: Figure 5—figure supplement 1—source data 1. [file elife-74493-fig5-figsupp1-data1.xlsx]

## Sheet: Fig5-S1
Panel D				Panel E				Panel F				Panel G
ctr	TTX			ctr	TTX			ctr	TTX			ctr	NMDG
-17.54	-17.35			-28.49	-23.15			300	450			29.1618	10.8694
-0.7	-17.19			-33.4	-31.35			200	180			27.2216	6.94398
17.57	-3.48			-18.13	-18.57			600	310			36.3241	10.6822
-1.74	-10.62			-20.02	-22.27			600	600
-7.01	-20.69			-29.29	-29.66			400	650
16.83	-14.9155			-27.2865	-23.2465			600	900
-2.54	-24.64			-29.02	-27.66			300	300
-2.02	-20.75			-26.3488	-23.88			240	300
-5.1457	-17.0788			-28.0671	-26.0376			500	800
-1.82705	-17.781			-26.4575	-27.9692			500	600
-0.06213	-9.96761			-30.9628	-18.6074			350	500
-4.24	-11.4586			-26.29	-18.4459			400	1200
-5.48619	-16.0987			-22.7282	-19.806			400	400
15.8087	-17.5035			-28.941	-21.308			500	500
-7.18785	-22.7612			-32.9731	-25.5735			500	650
-3.35113	-9.98182			-25.2686	-20.2854			500	850
-4.26738	-12.469			-28.9495	-24.8688			500	580
