# Supplementary material for: Distinct dendritic Ca2+ spike forms produce opposing input-output transformations in rat CA3 pyramidal cells
Source: eLife. 2021 Nov 24;10:e74493. doi: 10.7554/eLife.74493 (PMC8612760; doi:10.7554/eLife.74493)
Supplement: Figure 5—source data 1. [file elife-74493-fig5-data1.xlsx]

## Sheet: Fig5
Panel C				Panel D
				left			right
in ACSF	in TTX
group	width			Amplitude	Amplitude		Amplitude	Amplitude
ADP only	103.424			control	TTX		control	TTX
	300	no return		10.61	24.3344		10.95	6.48006
	221.96			10.2624	15.66		34.4116	14.3571
	255.67			11.5449	7.04708		35.61	15.0962
	65.6			20.3755	24.0576		18.28	11.8446
	16.64			24.5728	15.4788		22.28	9.16998
	159.38			26.77	12.0241		44.12	8.531
	100.31			16	12.9851		26.48	3.6
	300	no return					24.04	2.1358
	159.855						22.9214	9.15876
	99.14						24.6305	10.3882
	217.072						36.7936	8.83973
							22.05	7.18738
DI	8.06						17.242	3.90732
	5.42						44.7497	4.00455
	8.43						25.7852	2.0082
	7.37						21.9175	10.5036
	8.37						24.6821	12.3998
	8.87
	9.48
	6.948
	14.8771
	11.734
	12.3333
	8.22857
	11.3554
