# Supplementary material for: Distinct dendritic Ca2+ spike forms produce opposing input-output transformations in rat CA3 pyramidal cells
Source: eLife. 2021 Nov 24;10:e74493. doi: 10.7554/eLife.74493 (PMC8612760; doi:10.7554/eLife.74493)
Supplement: Figure 6—source data 1. [file elife-74493-fig6-data1.xlsx]

## Sheet: Fig6
Panel C						Panel F
	Ca2+	Ca2+	Ca2+
spike type	apical d1	apical d2	basal d3			experiment	distance	Ca2+
slow	103.671	100.465	89.6969			1	553	112.575
slow	107.884	161.735	158.118				453	90.839
slow	153.796	133.464	146.93				342	112.208
slow	106.652	116.62					233	62.6019
slow	94.0819	142.549					129	21.4565
						2	416	70.3954
fast	71.1886	6.19341					361	78.7039
fast	143.38	2.49029					292	63.0935
fast	56.0505	10.4298					155	25.373
fast	159.45	0.35753				3	517	72.5424
fast	118.876	10.2408					439	115.986
fast	134.998	9.3074					378	108.757
fast	76.6925	17.9169					349	109.45
fast	132.905	97.8387					247	98.7552
fast	138.805	6.46574					189	88.7331
							119	42.7617
						4	590	61.6677
							560	74.1269
							529	92.1884
							494	93.5309
							454	91.0064
							406	91.5153
							339	61.8304
							303	59.1049
							260	36.4135
							168	20.1515
							98	15.017
							35	1.86968
