# Supplementary material for: Distinct dendritic Ca2+ spike forms produce opposing input-output transformations in rat CA3 pyramidal cells
Source: eLife. 2021 Nov 24;10:e74493. doi: 10.7554/eLife.74493 (PMC8612760; doi:10.7554/eLife.74493)
Supplement: Figure 7—source data 1. [file elife-74493-fig7-data1.xlsx]

## Sheet: Fig7
Panel C				Panel D									Panel E									Panel F						Panel G
Primary trunk length	TE-covered length			group	TE-covered length	cumul. prob.		group	TE-covered length	cumul. prob.			group	primary trunk l	cumul. prob.		group	primary trunk l	cumul. prob.			group	trunk N	N	fraction			ADP only	DI
42.88	46.51			ADP only	9.82	0.05263	10	DI	18.6	0.02857			ADP only	29.86	0.05		DI	14.56	0.02439			ADP only	1	20	1			3	4
83	30.27			19	20.53	0.10526	21	35	19.45	0.05714			20	70.93	0.1		41	15.59	0.04878				2	0	0			4	4
77.08	19.25				22.38	0.15789	22		27	0.08571				79.51	0.15			20.3	0.07317				3	0	0			4	6
40.58	25.78				23.78	0.21053	24		27.39	0.11429				90.135	0.2			20.49	0.09756									6	6
111.64	33.93				27.44	0.26316	27		32.58	0.14286				101.57	0.25			20.66	0.12195			DI	1	26	0.63415			2	12
90.21	22.36				28.9	0.31579	29		32.94	0.17143				103.18	0.3			27.31	0.14634				2	10	0.2439			3	10
95.88	19.09				29.81	0.36842	30		33.93	0.2				103.3	0.35			28.01	0.17073				3	5	0.12195			4	3
224.13	37.51				31.15	0.42105	31		35.38	0.22857				110.014	0.4			29.7	0.19512									9	7
33.55	27				32.08	0.47368	32		35.92	0.25714				110.45	0.45			30.585	0.21951									4	5
110.014	22.38				32.29	0.52632	32		45.75	0.28571				111.49	0.5			31.005	0.2439									4	8
20.3	156.98				39.08	0.57895	39		47.48	0.31429				116.97	0.55			33.55	0.26829									6	2
57.775	82.6				40.12	0.63158	40		61.48	0.34286				127.16	0.6			34.515	0.29268									3	7
40.315	121.5				42.92	0.68421	43		65.73	0.37143				129.68	0.65			35.12	0.31707									3	6
47.89	126.45				46.44	0.73684	46		66.55	0.4				138	0.7			37.76	0.34146									4	7
110.12	75.15				47.85	0.78947	48		68.61	0.42857				164.32	0.75			37.85	0.36585									2	6
29.905	188.96				53.83	0.84211	54		69.04	0.45714				172.1	0.8			38.08	0.39024									4	4
29.86	99.89				59.6	0.89474	60		72.09	0.48571				175.91	0.85			40.315	0.41463									4	9
76.5927	120.71				69.4	0.94737	69		80.7	0.51429				198.06	0.9			40.66	0.43902									3	5
42.015	53.16				99.89	1	100		82.6	0.54286				204.66	0.95			42.63	0.46341									6	7
79.5567	140.2								85.58	0.57143				221.57	1			45.09	0.4878									5	4
70.93	42.92								95.5	0.6								47.03	0.5122										4
101.57	46.44								98.864	0.62857								48.7767	0.53659										5
14.56	61.48								101.83	0.65714								53.12	0.56098										6
127.29	37.06								102.35	0.68571								53.7333	0.58537										6
56.55	28.14								117.31	0.71429								57.775	0.60976										7
115.73	140.05								121.36	0.74286								60.51	0.63415										6
204.66	31.15								121.5	0.77143								65.1467	0.65854										5
39.32	81.54								125.71	0.8								69.57	0.68293										11
89.4	12.83								126.5	0.82857								70.0967	0.70732										5
18.046	50.32								130.04	0.85714								72.18	0.73171										3
185.87	39.87								140.05	0.88571								72.68	0.7561										9
33.64	96.995								147.5	0.91429								81.59	0.78049										3
48.48	116.492								156.98	0.94286								89.2	0.80488										7
68.77	123.82								163.18	0.97143								90.83	0.82927										7
89.2	27.39								178.61	1								94.15	0.85366										5
70.0967	95.5																	94.93	0.87805										5
172.1	69.4																	99.7	0.90244										6
53.12	19.45																	111.64	0.92683										6
99.7	32.94																	115.73	0.95122										5
81.59	18.6																	136.98	0.97561
127.28	25.56																	137.89	1
98.45	44.92
119.23	54.11
20.49	80.7
103.64	55.86
87.1	31.11
45.09	66.55
28.01	178.61
69.57	68.61
65.1467	147.5
138	20.53
116.97	23.78
221.57	32.08
111.49	9.82
53.7333	126.5
103.18	53.83
129.68	47.85
90.83	130.04
110.45	27.44
136.98	69.04
47.03	85.58
109.44	89.45
90.135	28.9
135.67	29.04
50.33	82.8
48.7767	117.31
94.15	45.75
103.3	29.81
127.16	59.6
175.91	39.08
27.31	125.71
42.63	72.09
164.32	40.12
72.18	32.58
44.96	102.06
38.08	47.48
198.06	32.29
37.17	77.31
137.89	35.92
34.515	163.18
134.85	37.33
20.66	101.83
111.73	53.23
30.585	121.36
40.66	65.73
37.85	98.864
37.76	102.35
94.93	35.38
26.06	64.921
