# Supplementary material for: Distinct dendritic Ca2+ spike forms produce opposing input-output transformations in rat CA3 pyramidal cells
Source: eLife. 2021 Nov 24;10:e74493. doi: 10.7554/eLife.74493 (PMC8612760; doi:10.7554/eLife.74493)
Supplement: Figure 8—source data 1. [file elife-74493-fig8-data1.xlsx]

## Sheet: Fig8
Panel B				Panel E							Panel F
				left			right
ADP	DI
1	1			dual	dendrite only		dual	dendrite only			sAP	Ca-AP
1	1			1.33212	1.20025		-1.51183	-5.28161			-3.98422	-5.6324
1	1			1.52555	1.39532		-2.71661	-2.64979			-3.79049	-4.66993
1	1			1.10625	1.28792		-1.04375	-2.44659			-2.7405	-2.96478
1	1			1.03948	1.35502		-0.67333	-3.61527			-5.45563	-8.36129
1	1			1.25741	1.1148		-3.69382	-3.7241			-0.11195	-1.8736
1	1				1.42998			-2.16892
1	1				1.52976			-2.64478
1	1				1.31975			-2.62347
1	1
1	1
1	1
1	1
1	1
1	1
1	1
2	1
2	1
3	1
3	1
3	1
4	1
5	1
6	1
7	1
8	1
10	1
10	1
	1
	1
